# Supplementary material
Source: publisher figshare collection journal article supplement (https://geolsoc.figshare.com/ndownloader/files/31796841)
Supplement: Supplementary file 1 [file 31796841]

## Sheet: Table S1
Table S1: Granulometry of volcaniclastic products from Las Derrumbadas domes
	Sample description	phi	-6	-5	-4	-3.5	-3	-2.5	-2	-1.5	-1	-0.5	0	0.5	1	1.5	2	2.5	3	3.5	4	>4	total	Total weight (g)
		um	31500	22400	16000	11200	8000	5600	4000	2800	2000	1400	1000	710	500	355	250	180	125	90	63
Surges
NE sector
DER 17-26B	10 cm-thick base of surge sequence with fine-grained white-pink-grey layers						0.569071	0	0.153649	0.429649	0.810926	2.21653	4.25381	6.49879	6.96543	8.12633	11.5891	9.58031	9.67421	6.17442	8.35681	24.6009	100	351.45
DER 17-26C	33 cm thick upper part of surge sequence with alternating beige (fine) and grey (coarser) layers						0.340965	0.857176	2.14484	4.50874	5.2802	8.88224	9.69942	11.949	9.13368	8.28603	7.62505	5.86308	4.9259	2.33533	2.14484	16.0235	100	524.98
DER 17-27B	<1 cm thick, grey coarser layer between white-pink and pink layer in surge sequence (4 cm above base) - middle unit									0.410568	1.35666	4.23063	8.94323	21.0996	23.3131	23.563	10.6569	2.80257	1.17815	1.10675	0.642628	0.69618	100	56.02
DER 17-28B	30 cm-thick package of fine-grained layers at base of surge sequence above paleosol - basal unit									0.27808	0.447222	0.957514	1.10945	1.74589	2.98435	4.35181	6.77713	9.70128	8.7323	9.74715	11.7138	41.454	100	348.82
DER 17-28C	Coarse layer in upper part of surge sequence that consists of white and grey layers - upper unit				3.98092	1.22956	3.70799	4.96237	8.41673	12.5355	10.4844	12.6899	9.41747	8.20721	3.83205	4.97615	4.54608	4.08293	0.490723	0.592727	0.347366	5.49996	100	362.73
DER 17-28D	Stratified grey and pink layers above basal layers - middle unit									0.0438596	0.336257	0.175439	0.277778	1.27193	4.7076	11.7105	14.4006	11.3012	7.30994	6.09649	5.08772	37.2807	100	68.4
DER 17-28E	Sample of grey coarse layer in package of grey and pink layers - middle unit					1.27292	1.69856	2.4822	3.59998	6.57146	6.5834	10.8477	10.5653	10.9034	6.26119	5.91909	6.24528	5.33036	3.51645	2.91977	2.47424	12.8088	100	251.39
Eastern sector
DER 17-61B	Intercalated layers of fine to coarse ash, over red DAD						1.07642	4.31536	7.13732	12.3254	11.666	16.7669	14.391	16.2917	6.89488	4.1505	2.2886	0.785493	0.193949	0.155159	0.223041	1.33825	100	103.12
DER 17-30B	2 cm-thick coarse layer made of fine lapilli fragments rich in white pumices at base of surge sequence							10.3818	10.3595	17.7048	10.4488	11.1186	7.25608	5.87185	3.28198	3.08104	2.52288	3.39361	2.3666	2.38893	2.45591	7.36772	100	44.79
DER 17-30C	20 cm thick coarse ash layer (light grey color) above basal pumice-rich layer										0.181923	0.305962	0.43827	2.03423	4.31655	8.02117	10.8989	20.5987	4.48193	8.05425	6.21847	34.4497	100	120.93
DER 17-30D	20 cm-thick massive layer of fine ash (light grey color)												0.0725479	0.33372	2.22722	7.91497	14.5096	16.4176	10.193	7.02989	5.73854	35.563	100	137.84
DER 17-30E	16 cm thick package of intercalated layers of coarse ash to fine lapilli							0.18863	0.159041	0.739727	0.850686	2.02685	3.2585	7.23823	11.3363	16.6217	14.7095	11.8615	5.49987	3.98343	2.67411	18.8519	100	270.37
DER 17-30F	13 cm-thick massive layer of fine ash													0.0318319	0.0795798	0.0636639	0.939042	7.00302	17.6269	15.3112	12.0166	46.9282	100	125.66
DER 17-30G	23 cm thick package of intercalated layers of coarse ash to fine lapilli							0.0443951	0	0.434438	0.783257	2.49564	3.85286	6.71952	7.1603	11.4095	12.6146	10.3187	7.14127	5.51768	3.42477	28.0831	100	315.35
DER 17-30H	20 cm-thick massive layer of fine to coarse ash									0.0555423	0.166627	0.555423	0.904547	2.38832	3.03102	3.69753	4.65762	12.4415	17.591	13.354	7.403	33.7539	100	126.03
DER 17-30I	20 cm thick package of intercalated layers of fine ash to coarse ash										0.055638	0.148368	0.299827	1.42804	6.98566	23.3989	19.9246	15.3221	6.75692	3.35064	1.77114	20.5582	100	323.52
DER 17-68B	6 cm thick, fine lapilli size layer rich in pumice					3.54565	4.00727	12.5522	15.2777	20.1788	12.9942	11.1477	5.96179	4.53273	1.72371	1.24736	1.10986	1.12459	0.987084	0.888867	0.6777	2.04292	100	203.63
DER 17-68G	Coarse layer within 74 cm-thick package of coarse ash layers with dune structures								0.749384	3.28123	5.95761	11.7332	14.8699	21.7161	13.4086	10.7216	6.84616	3.217	1.60047	4.04132	0.695857	1.16155	100	186.82
DER 17-68J	32 cm thick, massive fine ash layer at top of surge sequence (below modern soil)											0.179244	0.134433	0.466033	0.77971	2.4646	7.51927	15.4329	12.1886	10.5037	7.59993	42.7317	100	111.58
DER 18-77A	Basal part of surge sequence, light grey to white fine ash								0.0945453	0.216104	0.324155	0.818106	1.95844	5.12474	5.5145	7.0388	7.14299	7.11598	7.52889	9.39086	6.57958	41.1523	100	518.27
DER 18-77B	Middle part of surge sequence made of fine to coarse ash, grey to light beige layers									0.0243431	0.0600464	0.0730294	0.100618	0.279135	0.929908	5.18022	11.206	14.4744	9.58957	8.12412	9.18548	40.7731	100	616.19
DER 18-77C	Thin layer made of fine to coarse lapilli filling the base of a channel cut into the stratified surge sequence (A and B)				0.824141	0	3.79105	3.27279	3.73875	4.44085	4.10644	6.56935	7.90858	12.6712	11.0625	11.118	9.66464	8.23032	3.88614	1.99062	1.26157	5.4631	100	630.96
DER 18-77D	31 to 60 cm thick massive layer of fine and coarse ash in channel fill										0.0807583	0.182769	0.565308	1.5004	2.12947	3.63837	5.52982	8.14383	8.92591	9.67399	9.51248	50.1169	100	235.27
DER 18-77E	Basal part of 66-90 cm thick white massive layer of fine ash with accrecional lapilli mantling channel-cut deposits												0.0310091	0.070878	0.106317	0.265793	0.852751	2.55161	4.30362	10.6871	9.03473	72.0962	100	451.48
South-west sector
Distal
DER 17-20B	6 cm-thick finely-laminated, white pinkish basal layer with fine-scale wavy structures												0.0849377	0.1359	0.45017	1.78369	3.89581	9.20159	11.6166	11.4949	14.4054	46.8545	99.9236	353.2
DER 17-20C	7 cm-thick, grey ash to fine lapilli layer						0.504665	1.08194	2.73028	5.36979	5.5731	9.62495	11.1644	14.1524	10.4346	10.1441	6.94913	4.34956	3.40558	1.61929	1.64107	11.2551	100	275.43
DER 17-20D	1 m-thick, indurated fine ash layer with accretionary lapilli										0.0155249	0.182418	0.411411	1.76208	3.46982	6.04308	6.88143	9.07433	10.1921	9.01999	11.7601	41.1877	100	257.65
DER 17-21	2 m-thick white fine ash massive deposit directly on Ls basement									0.0425949	0.0425949	0.195936	0.621885	2.85812	6.96	12.7657	15.1979	14.1202	8.55731	7.07927	5.57567	25.9829	100	234.77
DER 17-71B	1.35 m-thick, cross-stratified, loose coarse ash and lapilli layers								0.0956384	1.12987	10.3868	41.0823	20.5289	7.82456	2.82467	2.89362	3.00483	3.44743	2.37984	1.43902	0.898557	2.06401	100	449.61
DER 17-71C	Ca. 30 cm-thick stratified sequence of thin layers alternating between coarse and fine ash									0.0649995	0.0855256	0.348945	0.605522	1.92946	2.85998	4.98786	7.35178	9.08967	9.15809	10.0578	9.8765	43.5839	100	292.31
DER 17-71D	Ca. 1 m-thick massive fine white ash layer with accretionary lapilli										0.0949031	0.139563	0.195389	0.111651	0.156311	0.831798	4.08642	11.6117	11.6005	11.0646	10.35	49.7572	100	179.13
Proximal
DER 17-16B	64 cm-thick sequence of stratified ash to fine-lapilli beds					1.60378	1.97792	6.17101	9.54738	15.6089	12.2006	15.0386	11.6074	11.7785	6.26911	4.37788	2.00986	0.73459	0.198476	0.095816	0.166537	0.613679	100	438.34
DER 17-16C	115 cm-thick, massive indurated, up to lapilli size; Gr clasts							0.160989	0.413742	0.896709	1.99466	6.80823	10.738	14.5293	10.7412	10.3757	9.71569	7.75646	6.61665	3.31799	2.93805	12.9967	100	621.16
DER 17-16D	90 cm thick indurated						0.501017	1.76107	4.39721	10.5459	11.0797	16.3302	13.4155	13.5602	7.85245	5.26	3.38971	2.64843	1.05664	0.839579	0.920124	6.44223	100	732.51
DER 17-16E	9 m thick lapilli layer				8.88968	7.69333	10.3615	14.2052	13.8833	13.5067	8.02353	7.51164	4.06445	2.46489	0.808077	0.523508	0.414824	0.538442	0.507745	0.928376	0.924228	4.75057	100	1205.33
DER 17-16G	1 m thick massive, indurated ash							0.120711	0.0241421	0.0885212	0.0692075	0.15451	0.363742	0.669542	0.366961	0.886822	2.77152	8.56563	10.6081	11.7041	12.1033	51.5033	100	621.32
Coarse PDC = Block and ash flow?
DER 17-16A	Up to 5 m-thick coarse, crudely stratified deposit rich in pink rhyolite				8.21129	11.2643	9.70896	9.73084	8.75517	9.45492	6.21219	6.38995	4.65152	4.49897	2.73268	2.3692	2.31415	2.35859	2.38777	1.34246	1.92547	5.69153	100	1507.68
Debris avalanches (block or matrix)
DER 17-62A	Matrix of domain in hummock rich in Gr, obsidian, rare marble, Ls and flint. Gr clasts with foliation and some altered skin. Obs: some with microvs patches, crust-to-core zonation.				20.0219	7.63444	6.03193	7.07282	7.45415	8.8394	5.89834	7.8277	6.05204	6.71418	3.55651	3.12654	2.32172	1.79512	1.04348	1.27176	1.0318	2.30616	100	1541.96
DER 18-84A	ca. 1 m-thick massive grey layer on top of hummock, made of Gr, obs and Ls				5.38875	2.98586	3.70242	6.81489	7.26569	10.2112	8.76141	11.053	9.12734	10.2126	6.34183	5.53623	3.93616	2.81055	1.52076	1.01152	0.695681	2.62411	100	718.72
DER 17-16I	5-m-thick massive coarse deposits made of Gr, mainly altered to red color and Ls (largest blocks are 15 cm in size)		5.31299	6.34967	9.65505	10.4229	8.02363	7.7606	6.51503	6.98019	4.24633	4.38075	3.39919	3.50266	2.39829	2.36831	2.39249	2.58396	2.07529	2.37895	1.87898	7.37474	100	1034.07
DER 17-48B	Matrix of obsidian and pumice-rich avalanche that flowed into Atexcac maar crater			0	4.79906	4.91371	6.42641	8.11195	8.60477	9.90443	7.2726	8.69119	6.80716	7.7312	4.63479	4.50217	3.72357	2.47867	2.1159	1.57944	1.24918	6.45379	100	1168.77
DER 19-128A	Blocky grey domain rich in Ls, flint and Gr			9.8735	10.73	6.92309	7.09735	6.31566	5.80487	7.20247	4.82281	5.62709	4.3847	4.66337	3.3589	3.46049	3.40616	2.92501	2.69925	2.01985	2.10734	6.5781	100	1417.43
DER 19-159A	Blocky grey domain			0	9.09884	9.4054	6.3333	7.29889	6.69218	7.47604	5.02166	5.8762	4.72703	5.62929	3.8009	4.72519	5.15934	3.89085	3.01979	2.50486	2.92066	6.41958	100	1089.48
DER 19-139A	Bulk sample of grey domain into hummock made mainly of light grey rhiolitic fragments with sparse Pl and Bt			0	7.82198	4.25464	4.59334	6.51777	4.43389	7.4261	5.52586	6.94664	5.79528	5.93164	4.30303	4.7165	4.51526	5.25315	4.26894	3.29682	3.56405	10.8351	100	909.36
DER 18-109A1	Matrix of late DAD from SE dome: grey, flow banded, dark grey to red and greenish rhyolitic fragments. Maybe some Ls fragments			16.5287	2.67324	5.61276	7.19992	7.43865	6.45881	7.76919	4.67227	4.79164	3.44059	3.51404	2.22858	2.37024	2.15643	2.14463	2.14594	2.48698	2.39254	13.9748	100	762.37
DER 18-87A	Coarse, inversely-graded layer (fallout) in sequence of faulted, stratified surge-like deposits present as block within hummock			0	1.20852	1.36931	5.52782	5.8896	11.5821	18.9798	14.3298	15.6356	10.1492	7.8126	3.04594	1.76999	0.897315	0.403273	0.225625	0.158197	0.150417	0.864897	100	771.19
DER 18-88A	Bulk sample of massive layer at base of faulted, stratified surge-like deposits as block within hummock			0	3.87892	4.58706	6.67466	7.82464	8.0798	9.99272	7.3494	8.42488	6.6387	7.36567	4.41752	4.28565	3.38571	2.83769	2.0542	1.52417	1.34093	9.33767	100	1167.85
DER 19-136A	Toba café in block within hummock			0	0	0	0	0	0.289404	0.678388	0.73129	1.39723	1.92625	3.80893	4.77984	8.11887	10.4061	11.489	9.28271	7.43426	9.60635	30.0513	100	321.35
DER 19-140A	Indurated white, stratified layers from block inside hummock (Cerro Pinto ash)			0	0	0	0	0	0	0.368691	0.385642	0.894181	1.64428	4.51329	9.21727	17.7989	17.3369	12.8364	7.26787	3.5513	2.79273	21.3925	100	235.97
DER 17-07	Pink ash as block in hummock							0.110351	0.209207	0.29427	0.285074	0.657509	1.49089	4.34738	5.97736	9.2718	12.3674	16.832	13.7422	15.3089	7.27973	11.826	100	869.95
DER 19-131A	Pink ash in block within hummock			0	0	0	0	0	0.041861	0.119603	0.119603	0.0657816	0.903002	2.90635	3.98278	6.97285	9.17354	12.0739	12.4985	11.7271	13.1563	26.2588	100	167.22
DER 19-131B	Greenish ash in block within hummock			0	0	0	0	0	0	0	0	0	0.0812636	2.13317	6.17604	13.1647	19.5134	21.7279	12.1692	7.40515	6.13033	11.4988	100	196.89
DER 19-147A	Stratified greenish ash in block within hummock (fallout?)			0	0	0	0	0	0	0	0	0.125134	1.78167	8.98284	10.8956	19.1574	20.1972	18.0551	11.0595	5.57145	2.58908	1.58503	100	335.64
DER 18-76A2	Bulk sample of pink ignimbritic deposit at base of quarry into large hummock				0	0.626305	0.103674	0.0610683	0.183205	0.305341	0.248534	0.548194	1.31368	4.48071	5.92646	10.2765	12.8968	14.4647	12.171	11.0988	10.9724	14.3226	100	704.13
DER 18-76B1	Bulk sample of green ignimbritic deposit at base of quarry into large hummock				0	0.139323	0.0568291	0.318976	0.830438	1.13017	1.13292	1.93586	2.23375	2.96703	3.69298	9.12749	11.6252	12.0844	11.8049	10.353	9.54546	21.0213	100	1090.99
Los Humeros Zaragoza
DER 19-96B	Matrix sample from ca. 2 m thick, massive, clast supported, fairly sorted and coarse-grained (up to 20 cm) pinkish pumice layer with few rhyolite lithics (Zaragoza ignimbrite). The pumice has fibrous texture (~70 vol % vesicle) and low crystalline content (Pl up to 2 mm lenght and Amp smaller than 1 mm))			5.86729	7.46852	3.31417	1.9643	2.48563	2.35995	3.32581	2.5345	3.5376	4.42898	7.95494	5.86962	6.07443	5.42975	4.5919	3.96118	3.58647	4.53837	20.7066	100	429.67
DER 19-96C	Matrix sample from 1.5 m thick, greenish, loose, massive, fairly well sorted, fine grained layer made of grey pumice (up to 5 cm) with fibrous texture and high crystal content Pl and Amp, as well as many lithics of rhyolite and some altered reddish fragments (Zaragoza ignimbrite)			0	0.48149	1.73926	3.01668	3.01791	3.0523	3.46378	2.58924	3.67013	3.79296	7.12408	7.82175	11.2511	12.2436	10.3975	5.99651	3.9207	3.4343	12.9867	100	814.14
Lahars
DER 17-13C	Matrix of massive, normally graded deposit covering Tepexitl maar; monolithic: grey and red rhyolite			0	0.266053	0.327849	1.36895	3.42331	5.22341	8.04715	7.00653	9.6713	7.88016	10.2553	7.64194	8.35755	7.59524	8.3217	5.40502	2.89498	2.43457	3.87899	100	2119.88
DER 17-16H	Poorly-sorted massive deposit with fine white matrix covering lahar sequence, just below DAD; contains charred wood dated at 960+/-30 BP				14.5323	5.84268	3.13925	5.62678	4.47621	4.56203	3.30553	4.05514	2.7517	3.36319	2.33466	3.42622	3.77488	5.89095	17.6635	2.68331	1.8452	10.7265	100	745.72
DER 17-16J	Cross-stratified poorly sorted deposits part of laharic sequence on top of PDCs				4.09064	4.04818	6.82039	8.3197	9.58275	13.2107	9.49293	11.071	7.97517	7.63987	3.83039	2.86326	1.91643	1.58421	1.14617	1.02435	1.0182	4.36564	100	1625.42
DER 19-169A	Whole sample from masive, matrix-supported and poorly-sorted deposit, with angular rhyolite fragments. PDC/BAF or thick coarse lahar			14.1987	17.0829	9.32331	7.50124	6.92711	6.66719	6.66667	4.30283	4.39103	3.141	3.24017	1.87322	1.95882	1.88888	2.22814	1.62374	1.37582	1.42645	4.18278	100	1915.95
DER 19-135A	Whole sample of a massive, poorly sorted, coarse grained layer in crudely stratified laharic sequence north of the NW dome				19.9519	5.62521	6.6497	7.15175	7.16933	7.72692	5.42481	5.92756	4.49876	4.7765	3.16066	3.24996	3.01511	2.8562	2.44415	1.83733	1.87108	6.66306	100	1422.17
DAD=Debris Avalanche Deposit
PDC=Pyroclastic Density Current
Sites identified on map (Fig. 3) and in text with only the last numbers

## Sheet: Table S2
Table S2: Componentry of volcaniclastic products from Las Derrumbadas domes
				Componentry
				vol.%
		Size fraction in phi		Juveniles			Lithics
	Sample description			Gr	Obs	Wr	Ls	Mv	Ox	Xs	Total
Surges
DER 17-26B	basal unit of NE sequence	0		37.1861	12.0424	6.77761	34.7655	2.118	7.11044	0	100
DER 17-26B	basal unit of NE sequence	1		44.9495	n.d.	6.56566	36.1111	2.77778	9.59596	0	100
DER 17-26C	upper unit of NE sequence	0		52.0481	22.6106	18.0776	6.60841	0	0.65538	0	100
DER 17-26C	upper unit of NE sequence	1		84.9673	n.d.	4.3573	10.6754	0	0	0	100
DER 17-28B	basal unit of NE sequence	1		66.0057	n.d.	14.1643	14.7309	2.26629	2.83286	0	100
DER 17-28C	upper unit of NE sequence	1		86.9099	n.d.	0	11.1588	1.50215	0	0.429185	100
DER 17-28D	middle unit of NE sequence-grey and pink layers	1		97.619	n.d.	0	1.68067	0	0.70028	0	100
DER 17-28E	middle unit of NE sequence-grey layer	1		66.5323	n.d.	11.4919	14.5161	0.201613	6.65323	0.604839	100
DER 17-61B	middle unit of surge sequence over DAD at base of NW dome	1		92.3077	n.d.	0	5.03979	2.12202	0	0.530504	100
DER 17-30B	basal unit of E-surge sequence	0		21.0526	1.14416	66.8192	3.20366	0	2.0595	5.72082	100
DER 17-30B	basal unit of E-surge sequence	1		45.3947	n.d.	41.2281	2.63158	3.94737	2.63158	4.16667	100
DER 17-30C	Surge sequence on top of DAD in eastern sector	1		93.2084	n.d.	0	1.87354	3.98126	0	0.936768	100
DER 17-30D	Surge sequence on top of DAD in eastern sector	1		92.5532	n.d.	0	5.67376	0	1.41844	0.35461	100
DER 17-30E	Surge sequence on top of DAD in eastern sector	1		93.6019	n.d.	0	1.89573	4.50237	0	0	100
DER 17-30G	Surge sequence on top of DAD in eastern sector	1		94.958	n.d.	0	1.47059	1.68067	1.47059	0.420168	100
DER 17-30H	Surge sequence on top of DAD in eastern sector	1		91.0526	n.d.	0	5.78947	2.10526	0	1.05263	100
DER 17-30I	Surge sequence on top of DAD in eastern sector	1		96.4912	n.d.	0	1.97368	1.53509	0	0	100
DER 18-77A	Surge sequence on top of ignimbritic hummocks	1		95.8071	n.d.	0	1.25786	0	1.04822	1.88679	100
DER 18-77B	Surge sequence on top of ignimbritic hummocks	1		95.339	n.d.	0	0.564972	0	2.54237	1.55367	100
DER 18-77C	Surge sequence on top of ignimbritic hummocks	1		77.0035	n.d.	0	5.92334	0.522648	12.7178	3.83275	100
DER 18-77D	Surge sequence on top of ignimbritic hummocks	1		89.5604	n.d.	0	5.86081	0	3.47985	1.0989	100
DER 17-20B	Surge sequence on top of paleosol, SW sector	1		79.1237	n.d.	0	9.79381	9.02062	0.515464	1.54639	100
DER 17-20C	Surge sequence on top of paleosol, SW sector	1		80.6045	n.d.	0	19.3955	0	0	0	100
DER 17-20D	Surge sequence on top of paleosol, SW sector	1		95.8763	n.d.	0	0	3.35052	0.515464	0.257732	100
DER 17-71B	Surge sequence on top of paleosol, SW sector	-1		96.6574	0.278552	1.11421	0	0.278552	1.67131	0	100
DER 17-71B	Surge sequence on top of paleosol, SW sector	0		98.3505	0	1.03093	0.206186	0.206186	0.206186	0	100
DER 17-71B	Surge sequence on top of paleosol, SW sector	1		96.7492	n.d.	0.928793	0	0.773994	1.54799	0	100
DER 17-71C	Surge sequence on top of paleosol, SW sector	1		95.3356	n.d.	0	0	0.682594	2.04778	1.93402	100
Debris avalanches and lahars				Gr	Gl	Wr	Ls	Mv	Ox	Xs	flint	total
DER 17-48B	Matrix of obsidian and pumice-rich avalanche that flowed into Atexcac maar crater	1		30.6355	0	61.5777	7.47948	0	0	0.307376	0	100
DER 19-128A	Blocky grey domain rich in Ls, flint and Gr	1		86.7159	1.10701	6.30996	5.86716	0	0	0	0	100
DER 19-159A	Blocky grey domain in hummock of NE avalanche	1		55.1013	0.639886	6.39886	14.5041	9.91824	10.9847	2.4529	0	100
DER 19-139A	Grey domain into hummock	1		84.1771	0	0.310253	11.3759	0	3.82645	0.310253	0	100
DER 18-87A	Stratified surge-like deposits as block within hummock	1		52.1008	0	26.521	20.4706	0.302521	0	0.302521	0.302521	100
DER 18-88A	Stratified surge-like deposits as block within hummock	1		60.31	0	25.3689	12.6844	0	1.6367	0	0	100
DER 19-136A	Toba café in block within hummock	1		16.909	3.7538	57.1187	0	17.5516	2.02908	2.63781	0	100
DER 19-140A	Indurated white, stratified layers from block inside hummock (Cerro Pinto ash)	1		13.8167	0	84.1673	1.91518	0	0	0.100799	0	100
DER 19-131A	Pink ash in block within hummock	1		1	86	6.7	0	0	6	0.3	0	100
DER 19-131B	Greenish ash in block within hummock	1		0	78	7	0	0	15	0	0	100
DER 19-147A	Greenish ash in block within hummock	1		0.664152	91.6636	3.93709	0	0.100951	3.33139	0.302853	0	100
DER 19-96B	Pink lapilli layer from Zaragoza ignimbrite, near Pizarro	1		0	29.7	56	0	0	14.3	0	0	100
DER 19-96C	Greenish lapilli layer from Zaragoza ignimbrite, near Pizarro	1		43.1964	5.13595	42.5257	0	3.08157	4.72507	1.33535	0	100
DER 19-169A	Matrix sample from masive, matrix-supported and poorly-sorted deposit, with angular rhyolite fragments. PDC/BAF or thick coarse lahar	1		95.2471	0	1.34322	0	0	3.40971	0	0	100
DER 19-135A	Whole sample of a massive, poorly sorted, coarse grained layer in crudely stratified laharic sequence north of the NW dome	1		62.4371	0	1.00705	33.2326	0.704935	2.31621	0	0.302115	100
n.d. = not determined
Gr = Grey Rhyolite (microcrystalline dome rhyolite)
Wr = White Rhyolite (pumiceous dome rhyolite)
Obs = Obsidian clasts (quantified separately in some samples)
Ls = Limestone
Mv : Mafic Volcanics (undifferentiated)
Ox : Oxidized clasts
Xs : Loose crystals
Gl : translucent glass shards
DAD=Debris Avalanche Deposit
PDC=Pyroclastic Density Current
Sites identified on map (Fig. 3) and in text with only the last numbers
